# Supplementary material for: The extreme drought of 1842 in Europe as described by both documentary data and instrumental measurements
Source: Copernicus journal article supplement (doi:10.5194/cp-15-1861-2019), 2019-10-17
Supplement: Supplementary file 1 [file cp-15-1861-2019-supplement.pdf]

Supplement of *Clim. Past*, 15, 1861–1884, 2019  
<https://doi.org/10.5194/cp-15-1861-2019-supplement>  
© Author(s) 2019. This work is distributed under  
the Creative Commons Attribution 4.0 License.

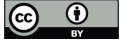

*Supplement of*

## **The extreme drought of 1842 in Europe as described by both documentary data and instrumental measurements**

**Rudolf Brázdil et al.**

*Correspondence to:* Rudolf Brázdil ([brazdil@sci.muni.cz](mailto:brazdil@sci.muni.cz))

The copyright of individual parts of the supplement might differ from the CC BY 4.0 License.

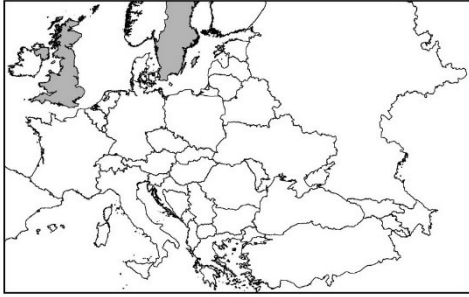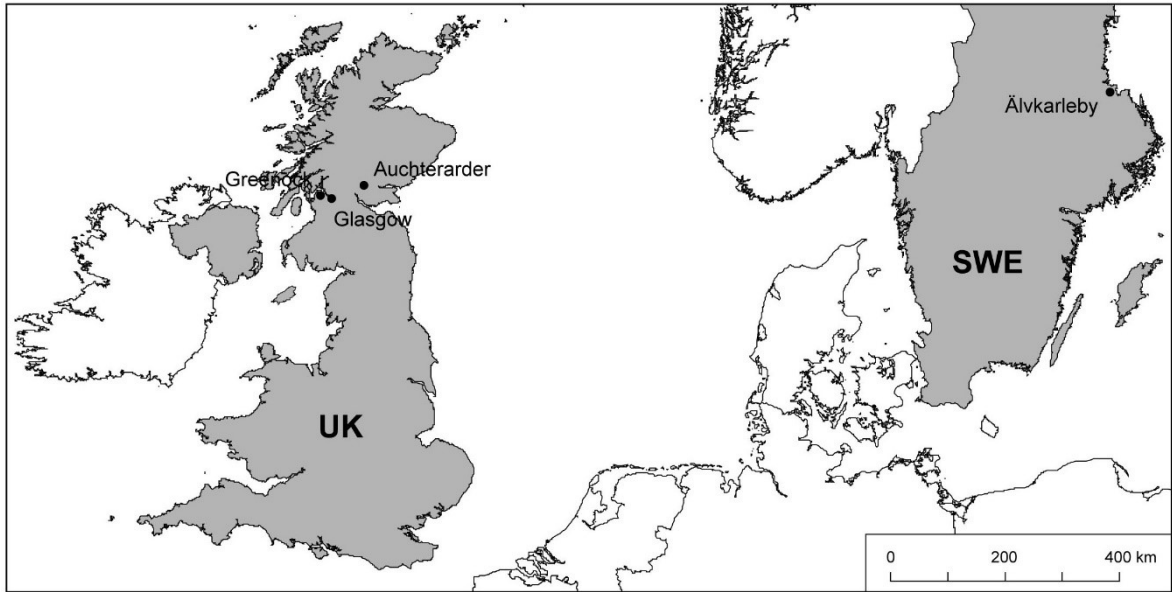

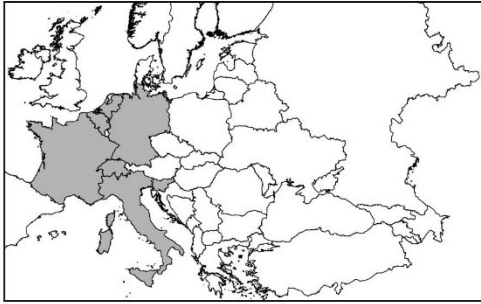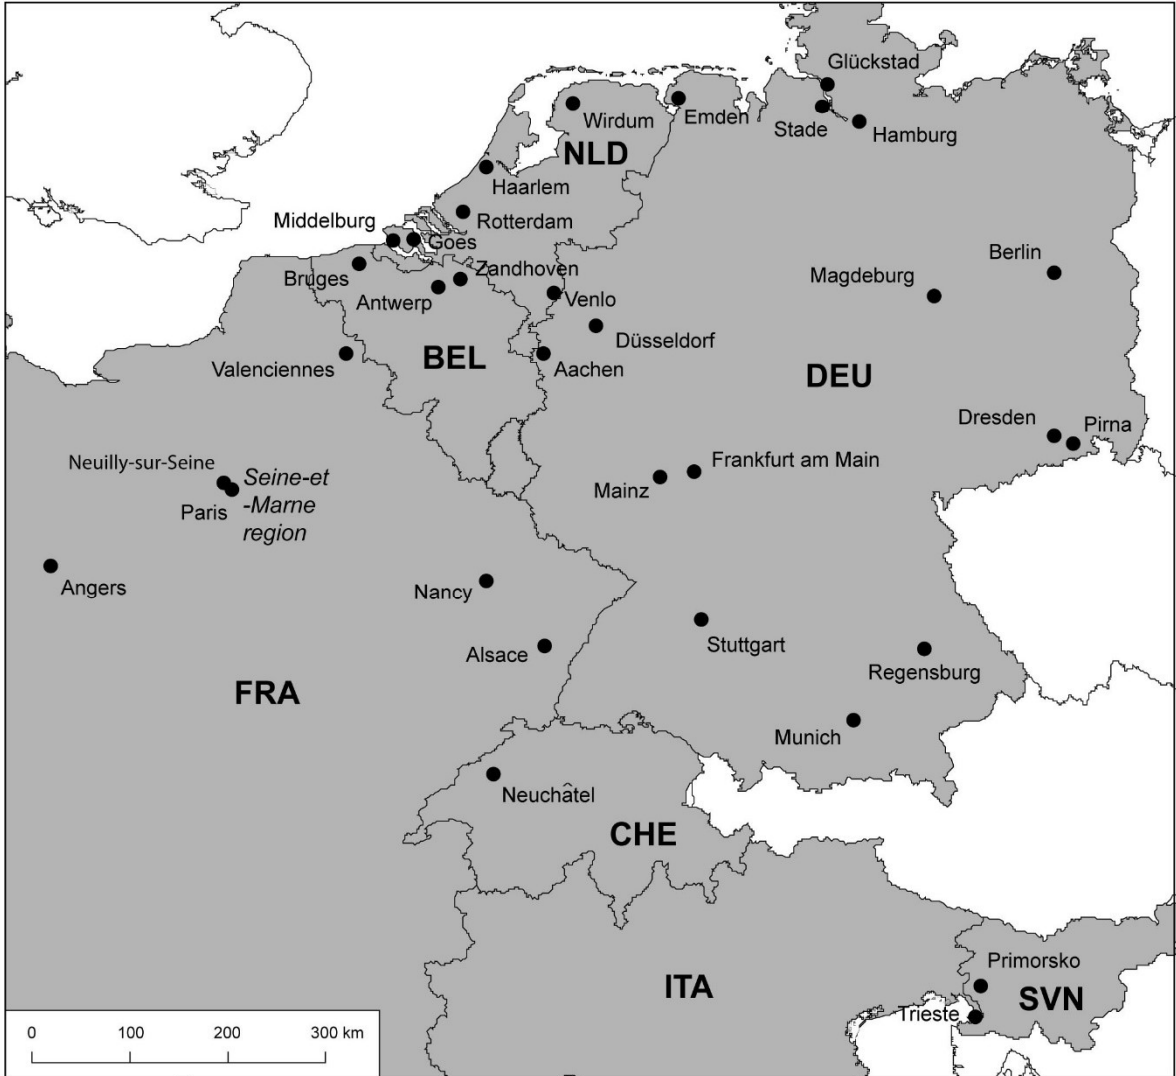

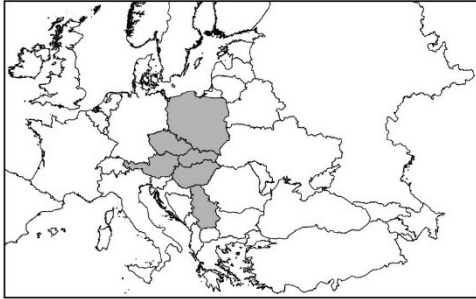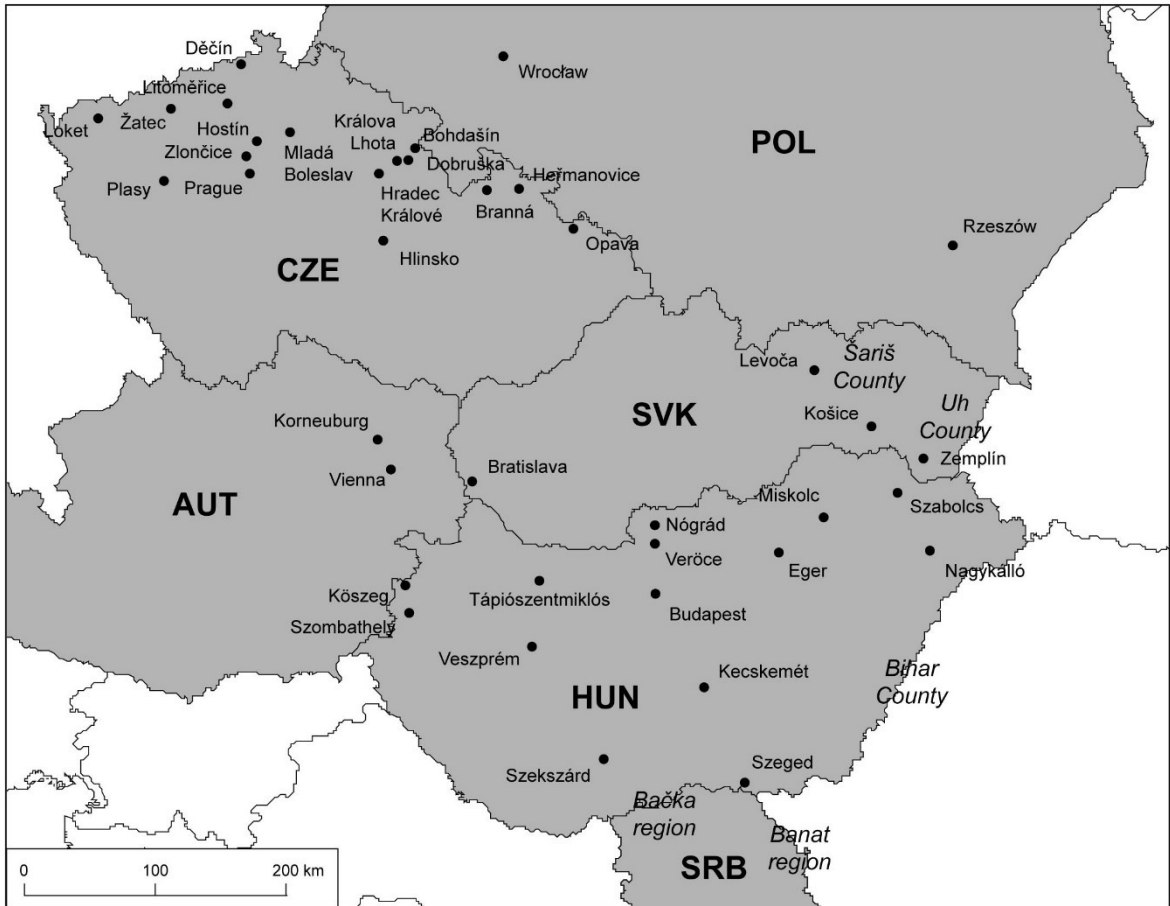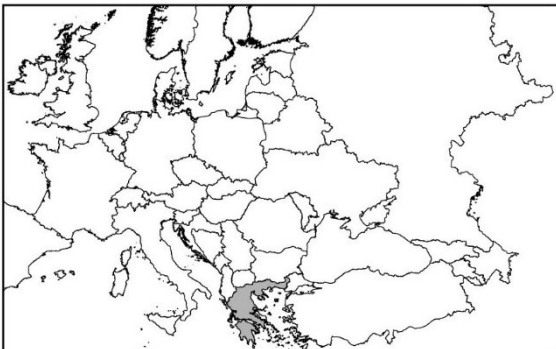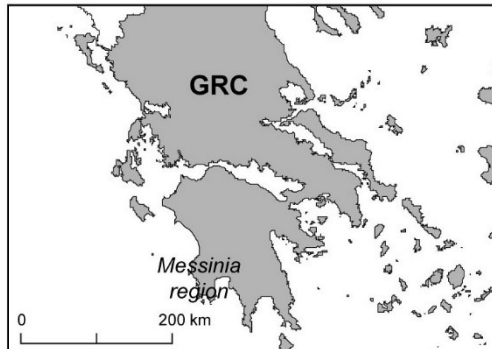

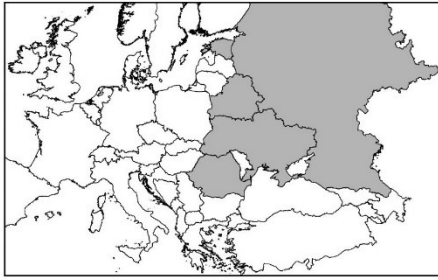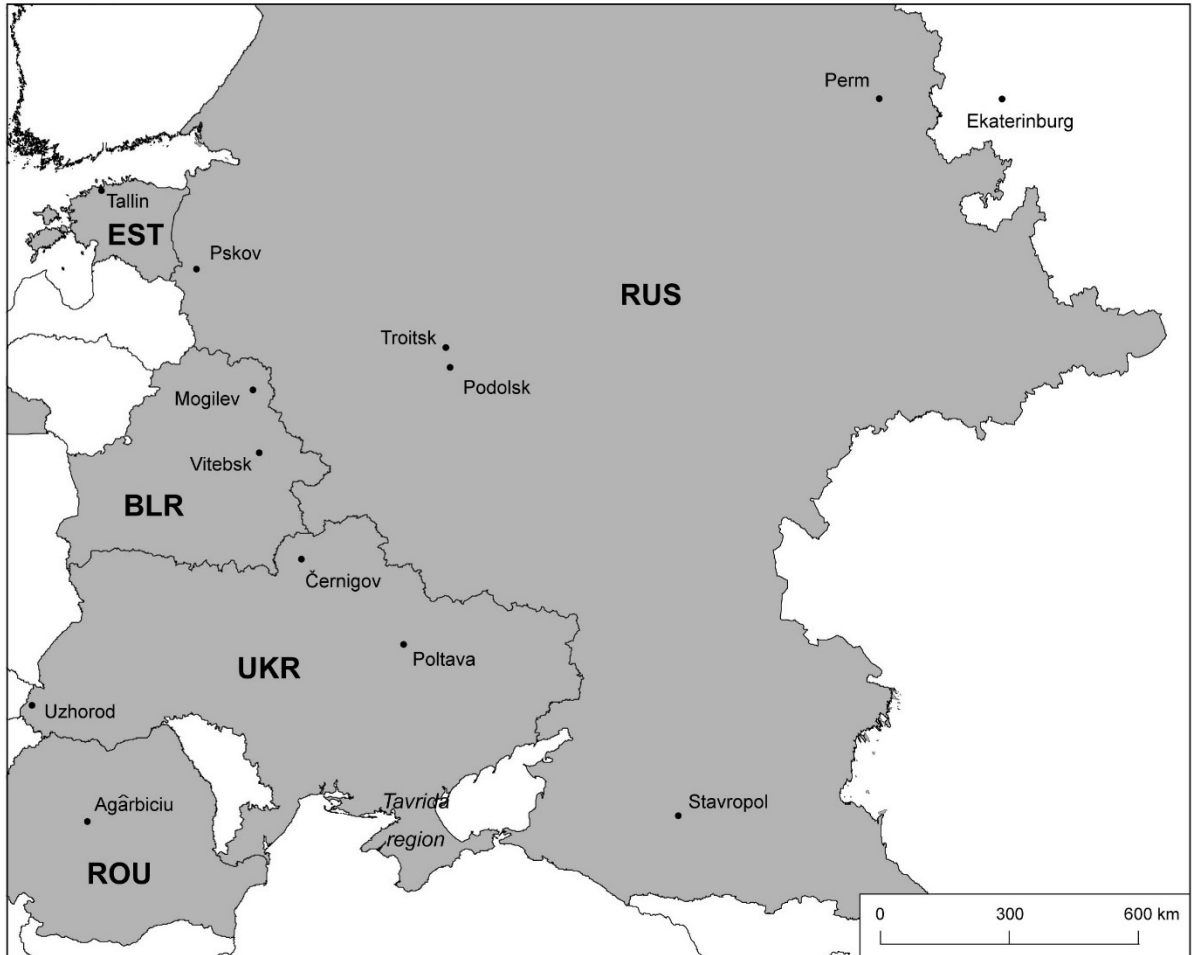

**Figure S1.** Locations in Europe reported by documentary data in this article

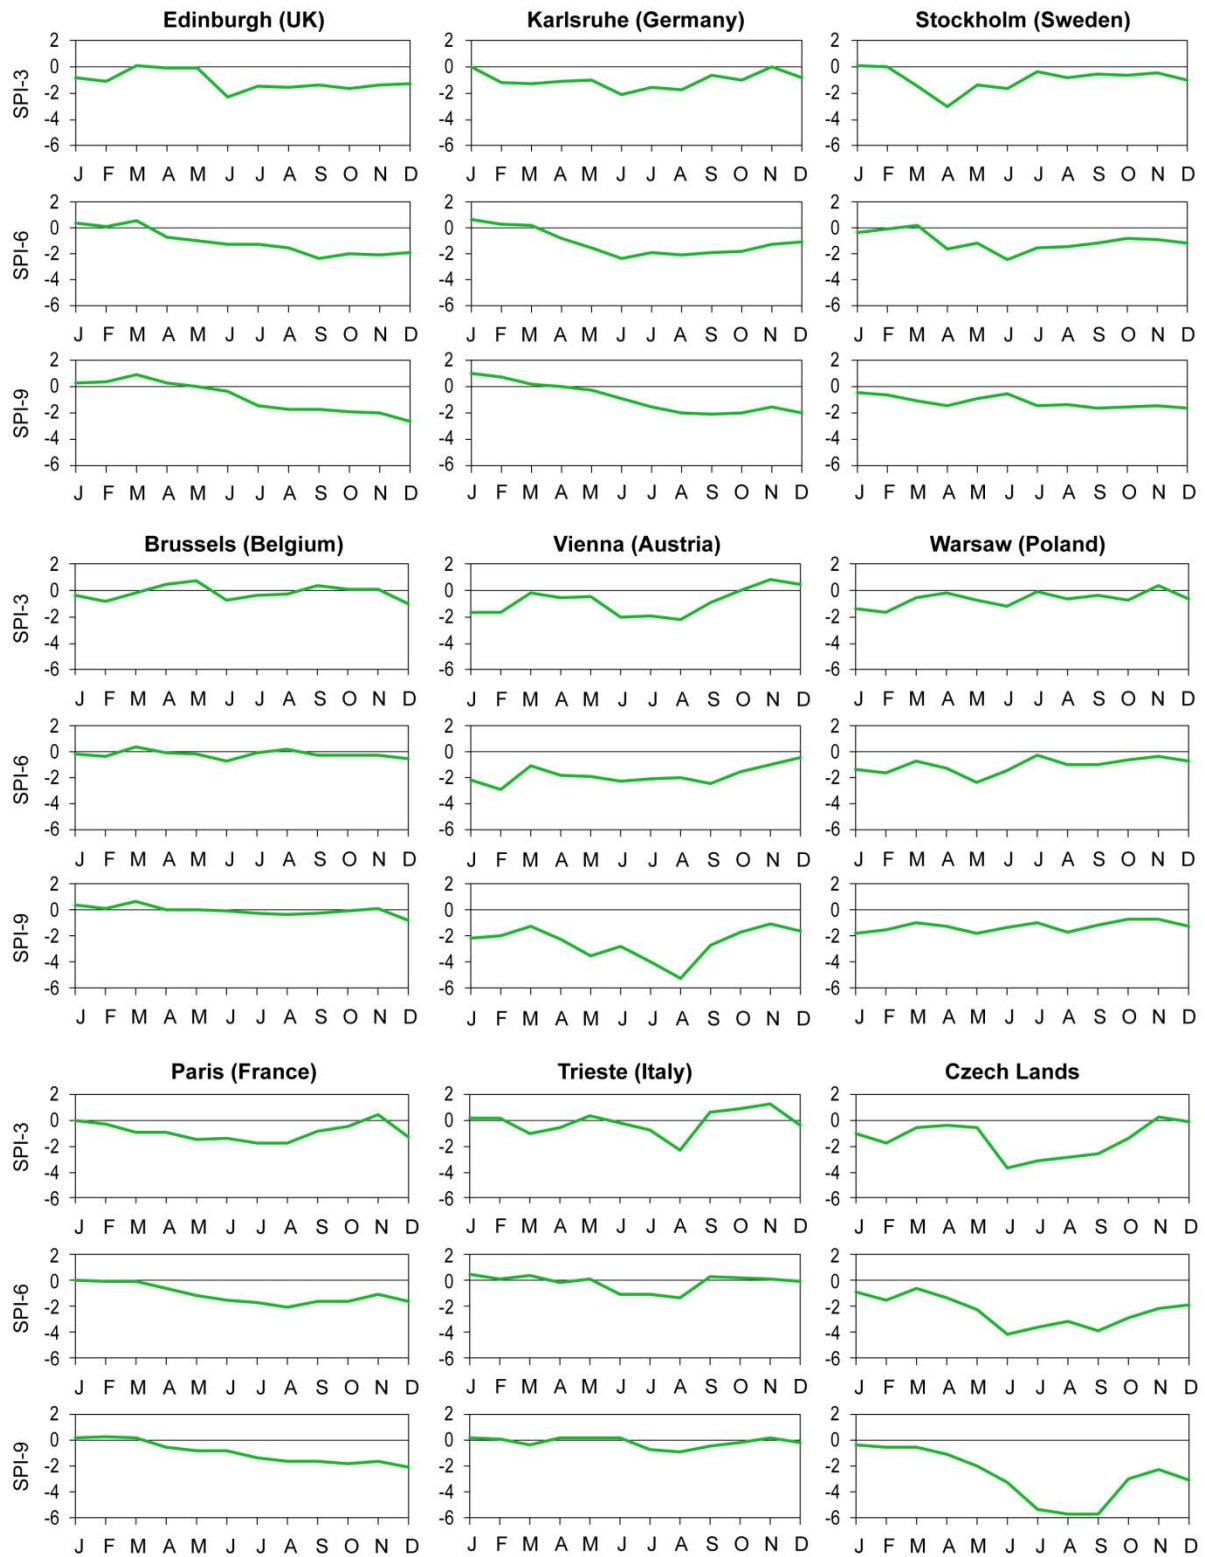

**Figure S2.** Annual variation of SPI-3, SPI-6 and SPI-9 for selected European stations and regions in 1842

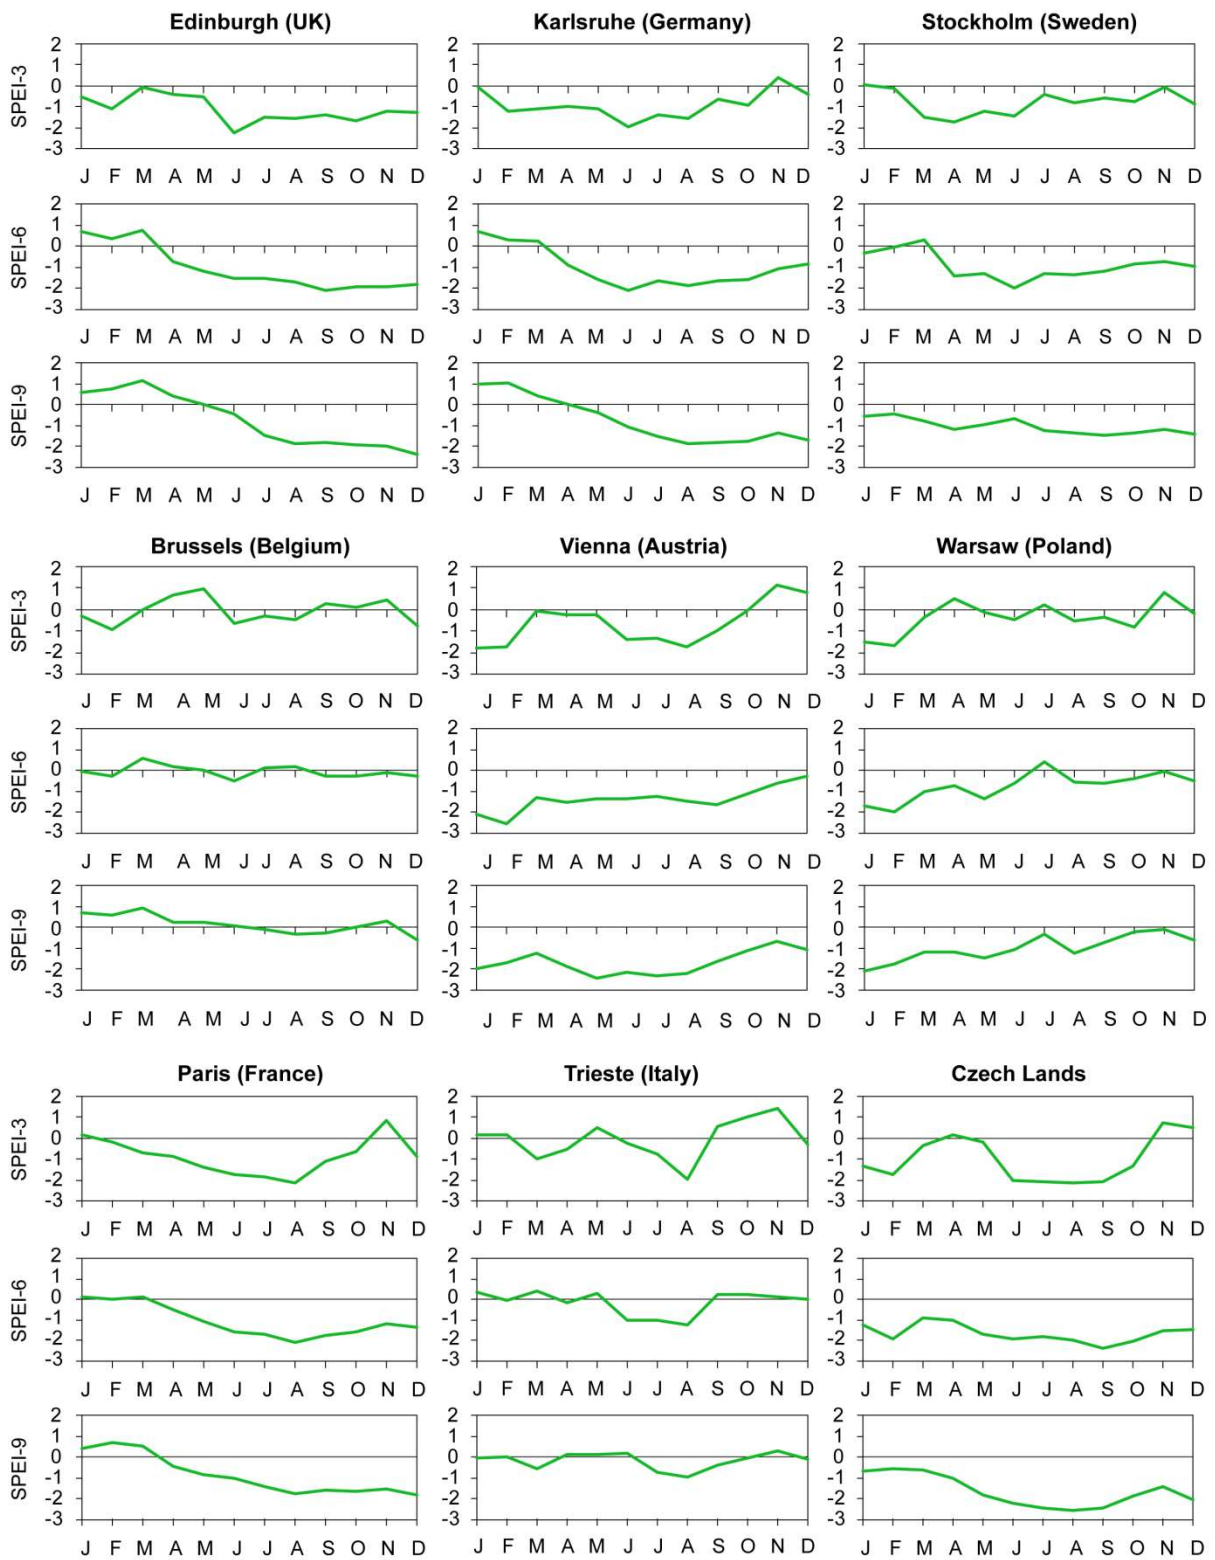

**Figure S3.** Annual variation of SPEI-3, SPEI-6 and SPEI-9 for selected European stations and regions in 1842
